# Supplementary material for: The neuronal sortilin-related receptor SORL1 is genetically associated with Alzheimer disease
Source: Springer Nature journal article supplement (doi:10.1038/ng1943), 2007-01-14
Supplement: ng1943-S6.pdf [file ng1943-S6.pdf]

**Supplemental Tables 5-8: Two, four, five and six SNP haplotypes for all SORL1 SNPs**

Haplotype tables using a 2, 4, 5, or 6 SNP sliding window. Black highlights represent haplotypes that are significantly associated with AD, while gray highlights represent haplotypes that are protective. As was evident with the 3 SNP window analyses (see main text and Table 4) there was a general clustering of significant results near SNPs 8-10 at the 5' end in the Caribbean Hispanics, and near SNPs 22-25 at the 3' end in the North Europeans and MIRAGE African American cohorts. Part A refers to the discovery cohorts, Part B refers to the replication cohorts.

Supplemental Table 5

| SNP  |     | Discovery Datasets      |      |         |             |              |                             |       |         |             |              | Replication Datasets      |                 |         |             |              |                             |                 |         |             |              |                        |        |         |             |              |                               |       |         |             |              |        |       |
|------|-----|-------------------------|------|---------|-------------|--------------|-----------------------------|-------|---------|-------------|--------------|---------------------------|-----------------|---------|-------------|--------------|-----------------------------|-----------------|---------|-------------|--------------|------------------------|--------|---------|-------------|--------------|-------------------------------|-------|---------|-------------|--------------|--------|-------|
| SNP# | HAP | North European Families |      |         |             |              | Caribbean Hispanic Families |       |         |             |              | Israeli Arab case:control |                 |         |             |              | North European case:control |                 |         |             |              | MIRAGE Caucasians Sibs |        |         |             |              | MIRAGE African-Americans Sibs |       |         |             |              |        |       |
|      |     | Hap frequency           | Info | Z Score | Hap p-value | Global sim p | Hap frequency               | Info  | Z Score | Hap p-value | Global sim p | Control frequency         | Cases frequency | Z Score | Hap p-value | Global sim p | Control frequency           | Cases frequency | Z Score | Hap p-value | Global sim p | Hap frequency          | Info   | Z Score | Hap p-value | Global sim p | Hap frequency                 | Info  | Z Score | Hap p-value | Global sim p |        |       |
| 1    | 2   | A                       | C    | 0.522   | 52          | -1.978       | 0.048                       | 0.117 | 0.310   | 70          | -0.669       | 0.503                     | 0.625           | 0.416   | 0.353       | -1.335       | 0.182                       | 0.019           | ND      | ND          | ND           | ND                     | ND     | 0.506   | 67          | 0.564        | 0.573                         | 0.885 | 0.065   | 27          | -1.577       | 0.115  | 0.012 |
| 1    | 2   | A                       | G    | 0.298   | 47          | 0.932        | 0.351                       |       | 0.286   | 65          | -0.415       | 0.678                     |                 | 0.342   | 0.473       | 2.659        | 0.0078                      |                 | ND      | ND          | ND           | ND                     | ND     | 0.286   | 61          | -0.010       | 0.992                         |       | 0.346   | 42          | -2.008       | 0.045  |       |
| 1    | 2   | G                       | G    | 0.180   | 36          | 1.317        | 0.188                       |       | 0.401   | 66          | 1.018        | 0.309                     |                 | 0.229   | 0.175       | -1.398       | 0.162                       |                 | ND      | ND          | ND           | ND                     | ND     | 0.205   | 65          | -0.599       | 0.549                         |       | 0.579   | 50          | 2.712        | 0.0067 |       |
| 3    | 4   | A                       | T    | 0.506   | 53          | -0.911       | 0.362                       | 0.289 | 0.498   | 97          | 0.033        | 0.973                     | 0.978           | 0.489   | 0.573       | 2.028        | 0.043                       | 0.019           | 0.511   | 0.630       | 2.759        | 0.0058                 | 0.013  | 0.530   | 84          | 0.161        | 0.872                         | 0.236 | 0.412   | 43          | -0.749       | 0.454  | 0.582 |
| 3    | 4   | A                       | C    | 0.357   | 54          | 1.678        | 0.093                       |       | 0.273   | 72          | -0.128       | 0.898                     |                 | 0.319   | 0.225       | -2.604       | 0.0092                      |                 | 0.349   | 0.271       | -1.754       | 0.079                  |        | 0.372   | 84          | 0.841        | 0.400                         |       | 0.076   | 23          | -0.709       | 0.479  |       |
| 3    | 4   | G                       | T    | 0.078   | 17          | -1.188       | 0.235                       |       | 0.126   | 51          | 0.400        | 0.689                     |                 | 0.105   | 0.156       | 1.388        | 0.165                       |                 | 0.086   | 0.030       | -2.162       | 0.031                  |        | 0.041   | 20          | -2.186       | 0.029                         |       | 0.347   | 46          | 0.148        | 0.882  |       |
| 4    | 5   | T                       | C    | 0.307   | 54          | -1.785       | 0.074                       | 0.217 | 0.198   | 61          | -0.142       | 0.887                     | 0.968           | 0.249   | 0.398       | 3.242        | 0.0012                      | 0.0017          | 0.321   | 0.411       | 2.269        | 0.023                  | 0.108  | 0.311   | 67          | -1.403       | 0.161                         | 0.513 | 0.112   | 35          | -0.079       | 0.937  | 0.761 |
| 4    | 5   | C                       | T    | 0.360   | 55          | 1.563        | 0.118                       |       | 0.364   | 84          | 0.112        | 0.911                     |                 | 0.381   | 0.247       | -3.242       | 0.0012                      |                 | 0.341   | 0.298       | -1.565       | 0.118                  |        | 0.386   | 69          | 0.960        | 0.337                         |       | 0.232   | 41          | 0.645        | 0.519  |       |
| 5    | 6   | T                       | A    | 0.343   | 56          | 1.194        | 0.232                       | 0.509 | 0.307   | 83          | -0.491       | 0.823                     | 0.424           | 0.345   | 0.268       | -2.035       | 0.042                       | 0.0085          | 0.336   | 0.292       | -1.374       | 0.170                  | 0.367  | 0.368   | 71          | 0.307        | 0.759                         | 0.582 | 0.221   | 50          | 0.404        | 0.687  | 0.920 |
| 5    | 6   | C                       | T    | 0.364   | 58          | -1.304       | 0.192                       |       | 0.188   | 62          | -0.081       | 0.836                     |                 | 0.249   | 0.405       | 3.312        | 0.00093                     |                 | 0.353   | 0.421       | 1.791        | 0.073                  |        | 0.332   | 68          | -0.934       | 0.350                         |       | 0.110   | 39          | -0.651       | 0.515  |       |
| 6    | 7   | A                       | A    | 0.339   | 54          | 1.119        | 0.263                       | 0.252 | 0.324   | 87          | -1.041       | 0.298                     | 0.246           | 0.372   | 0.279       | -2.132       | 0.033                       | 0.044           | 0.357   | 0.309       | -1.441       | 0.150                  | 0.239  | 0.361   | 71          | 1.403        | 0.161                         | 0.299 | 0.241   | 52          | 0.134        | 0.894  | 0.595 |
| 6    | 7   | T                       | G    | 0.534   | 58          | -1.668       | 0.095                       |       | 0.513   | 86          | 1.888        | 0.059                     |                 | 0.499   | 0.620       | 2.435        | 0.015                       |                 | 0.522   | 0.592       | 1.900        | 0.057                  |        | 0.443   | 74          | -0.348       | 0.728                         |       | 0.538   | 51          | -1.012       | 0.311  |       |
| 7    | 8   | G                       | C    | 0.526   | 53          | -1.803       | 0.071                       | 0.185 | 0.501   | 87          | 1.922        | 0.055                     | 0.051           | 0.499   | 0.620       | 2.476        | 0.015                       | 0.017           | 0.527   | 0.601       | 1.974        | 0.048                  | 0.206  | 0.432   | 78          | -0.755       | 0.450                         | 0.400 | 0.553   | 55          | -0.724       | 0.469  | 0.786 |
| 7    | 8   | A                       | T    | 0.419   | 54          | 1.185        | 0.236                       |       | 0.371   | 88          | -2.168       | 0.030                     |                 | 0.459   | 0.322       | -2.934       | 0.0033                      |                 | 0.428   | 0.349       | -2.092       | 0.036                  |        | 0.392   | 75          | 1.484        | 0.138                         |       | 0.252   | 51          | 0.089        | 0.929  |       |
| 8    | 9   | C                       | G    | 0.574   | 52          | -0.522       | 0.602                       | 0.562 | 0.629   | 75          | 2.829        | 0.0047                    | 0.0048          | 0.534   | 0.659       | 2.665        | 0.0077                      | 0.018           | 0.570   | 0.640       | 1.914        | 0.056                  | 0.046  | 0.447   | 64          | -0.942       | 0.346                         | 0.366 | 0.461   | 55          | 0.169        | 0.866  | 0.995 |
| 8    | 9   | T                       | A    | 0.411   | 52          | 0.615        | 0.538                       |       | 0.349   | 74          | -2.347       | 0.019                     |                 | 0.447   | 0.313       | -2.903       | 0.0037                      |                 | 0.417   | 0.349       | -1.862       | 0.063                  |        | 0.222   | 55          | 0.094        | 0.925                         |       | 0.128   | 30          | -0.025       | 0.980  |       |
| 8    | 9   | T                       | G    | 0.004   | 0           | *            | *                           |       | 0.010   | 2           | *            | *                         |                 | 0.010   | 0.014       | 0.329        | 0.742                       |                 | *       | *           | -1.862       | 0.063                  |        | 0.204   | 34          | 1.801        | 0.072                         |       | 0.122   | 29          | -0.282       | 0.793  |       |
| 9    | 10  | G                       | C    | 0.571   | 54          | -0.184       | 0.854                       | 0.181 | 0.635   | 81          | 2.633        | 0.0085                    | 0.013           | 0.539   | 0.658       | 2.563        | 0.010                       | 0.044           | 0.569   | 0.646       | 2.125        | 0.034                  | 0.070  | 0.428   | 61          | -0.322       | 0.747                         | 0.854 | 0.490   | 51          | -0.105       | 0.916  | 0.989 |
| 9    | 10  | A                       | T    | 0.407   | 54          | 0.680        | 0.497                       |       | 0.337   | 78          | -2.479       | 0.013                     |                 | 0.438   | 0.313       | -2.714       | 0.0067                      |                 | 0.417   | 0.351       | -1.842       | 0.066                  |        | 0.228   | 53          | -0.158       | 0.875                         |       | 0.122   | 26          | 0.317        | 0.751  |       |
| 10   | 11  | T                       | A    | 0.410   | 57          | 0.965        | 0.335                       | 0.478 | 0.366   | 89          | -1.527       | 0.127                     | 0.094           | 0.418   | 0.265       | -3.187       | 0.0014                      | 0.0037          | 0.395   | 0.322       | -1.961       | 0.050                  | 0.244  | 0.465   | 75          | -0.330       | 0.742                         | 0.655 | 0.193   | 39          | 1.039        | 0.299  | 0.440 |
| 10   | 11  | C                       | C    | 0.389   | 59          | -1.381       | 0.167                       |       | 0.206   | 66          | -1.062       | 0.288                     |                 | 0.281   | 0.423       | 3.067        | 0.0022                      |                 | 0.396   | 0.457       | 1.748        | 0.080                  |        | 0.359   | 75          | -0.400       | 0.689                         |       | 0.105   | 36          | -0.505       | 0.613  |       |
| 10   | 11  | C                       | A    | 0.181   | 43          | 0.330        | 0.742                       |       | 0.419   | 84          | 2.220        | 0.026                     |                 | 0.271   | 0.262       | -0.268       | 0.789                       |                 | 0.188   | 0.193       | 0.222        | 0.825                  |        | 0.157   | 53          | 1.039        | 0.299                         |       | 0.694   | 51          | -0.167       | 0.867  |       |
| 11   | 12  | C                       | C    | 0.556   | 55          | -0.034       | 0.973                       | 0.199 | 0.706   | 67          | 0.112        | 0.911                     | 0.948           | 0.690   | 0.528       | -3.146       | 0.0017                      | 0.0015          | 0.544   | 0.463       | -1.971       | 0.049                  | 0.090  | 0.590   | 68          | 0.386        | 0.700                         | 0.834 | 0.828   | 40          | 0.046        | 0.963  | 0.607 |
| 11   | 12  | C                       | C    | 0.406   | 54          | -0.827       | 0.408                       |       | 0.213   | 67          | 0.169        | 0.866                     |                 | 0.310   | 0.472       | 3.146        | 0.0017                      |                 | 0.407   | 0.497       | 2.225        | 0.026                  |        | 0.366   | 72          | -0.699       | 0.485                         |       | 0.104   | 31          | -0.833       | 0.405  |       |
| 11   | 12  | A                       | T    | 0.039   | 13          | 2.067        | 0.039                       |       | 0.081   | 34          | -0.362       | 0.718                     |                 | 0.049   | 0.040       | -0.603       | 0.546                       |                 | 0.044   | 0.040       | -0.603       | 0.546                  |        | 0.044   | 21          | 0.480        | 0.631                         |       | 0.067   | 23          | 0.890        | 0.373  |       |
| 12   | 13  | C                       | G    | 0.962   | 11          | -2.254       | 0.024                       | 0.030 | 0.928   | 24          | 0.351        | 0.725                     | 0.661           | 1       | 1           | *            | *                           |                 | 0.949   | 0.960       | 0.739        | 0.460                  | 0.821  | 0.961   | 21          | -0.736       | 0.462                         | 0.471 | 0.942   | 25          | -0.934       | 0.350  | 0.412 |
| 12   | 13  | T                       | A    | 0.036   | 11          | 2.254        | 0.024                       |       | 0.067   | 24          | -0.125       | 0.901                     |                 | 0       | 0           | *            | *                           |                 | 0.049   | 0.040       | -0.624       | 0.533                  |        | 0.034   | 22          | 0.905        | 0.366                         |       | 0.047   | 24          | 0.709        | 0.479  |       |
| 13   | 14  | G                       | T    | 0.902   | 29          | -0.881       | 0.378                       | 0.063 | 0.803   | 61          | -2.133       | 0.033                     | 0.019           | 0.810   | 0.836       | 0.695        | 0.487                       | 0.482           | 0.868   | 0.843       | -0.846       | 0.937                  | 0.243  | 0.906   | 35          | -1.639       | 0.101                         | 0.235 | 0.885   | 36          | -0.790       | 0.429  | 0.280 |
| 13   | 14  | G                       | C    | 0.061   | 18          | -0.790       | 0.430                       |       | 0.123   | 50          | 2.611        | 0.0090                    |                 | 0.190   | 0.164       | -0.695       | 0.487                       |                 | 0.081   | 0.118       | 1.632        | 0.103                  |        | 0.054   | 21          | 1.455        | 0.148                         |       | 0.059   | 16          | 0.025        | 0.980  |       |
| 13   | 14  | A                       | T    | 0.036   | 12          | 2.660        | 0.0078                      |       | 0.070   | 31          | -0.727       | 0.467                     |                 | *       | *           | *            | *                           |                 | 0.052   | 0.039       | -0.749       | 0.454                  |        | 0.036   | 19          | 0.706        | 0.480                         |       | 0.051   | 24          | 0.271        | 0.787  |       |
| 14   | 15  | T                       | G    | 0.581   | 52          | 0.949        | 0.343                       | 0.703 | 0.725   | 72          | -2.669       | 0.0076                    | 0.011           | 0.541   | 0.466       | -1.419       | 0.156                       | 0.083           | 0.569   | 0.500       | -1.752       | 0.080                  | 0.132  | 0.614   | 72          | 0.291        | 0.771                         | 0.258 | 0.887   | 35          | 0.268        | 0.789  | 0.421 |
| 14   | 15  | C                       | G    | 0.063   | 20          | -0.344       | 0.731                       |       | 0.121   | 45          | 2.484        | 0.013                     |                 | 0.182   | 0.164       | -0.595       | 0.552                       |                 | 0.082   | 0.118       | 1.502        | 0.133                  |        | 0.065   | 18          | 1.852        | 0.064                         |       | 0.054   | 22          | 1.072        | 0.284  |       |
| 15   | 16  | G                       | T    | 0.041   | 24          | -0.353       | 0.724                       | 0.793 | 0.040   | 18          | 0.118        | 0.906                     | 0.861           | 0.044   | 0.055       | 0.538        | 0.591                       | 0.115           | 0.063   | 0.008       | -3.621       | 0.00029                | 0.0031 | 0.047   | 22          | 0.628        | 0.530                         | 0.253 | 0.002   | 1           | *            | *      | 0.730 |
| 15   | 16  | G                       | A    | 0.611   | 57          | 0.830        | 0.407                       |       | 0.813   | 78          | 0.117        | 0.538                     |                 | 0.680   | 0.579       | -2.064       | 0.039                       |                 | 0.586   | 0.609       | 0.462        | 0.652                  |        | 0.644   | 69          | 0.866        | 0.386                         |       | 0.947   | 18          | 0.698        | 0.485  |       |
| 15   | 16  | T                       | T    | 0.018   | 2           | *            | *                           |       | 0.003   | 4           | *            | *                         |                 | *       | *           | *            | *                           |                 | 0.011   | 0.016       | -0.291       | 0.771                  |        | 0.015   | 10          | 1.330        | 0.183                         |       | 0.004   | 2           | *            | *      |       |
| 16   | 17  | A                       | T    | 0.265   | 52          | 2.616        | 0.0089                      | 0.022 | 0.444   | 91          | 0.105        | 0.916                     | 0.557           | 0.430   | 0.332       | -2.069       | 0.039                       | 0.122           | 0.300   | 0.348       | 1.409        | 0.159                  | 0.0061 | 0.309   | 78          | -0.728       | 0.466                         | 0.213 | 0.762   | 54          | 0.425        | 0.671  | 0.625 |
| 16   | 17  | T                       | G    | 0.055   | 23          | -1.445       | 0.148                       |       | 0.019   | 14          | -0.494       | 0.621                     |                 | 0.045   | 0.050       | 0.509        | 0.610                       |                 | 0.074   |             |              |                        |        |         |             |              |                               |       |         |             |              |        |       |

Supplemental Table 6

| SNP  |     | Discovery Datasets      |      |   |             |              |                             |               |                |              |              | Replication Dataset       |               |                |               |              |                             |               |                |                |              |                        |               |               |              |              |                               |        |              |             |              |    |        |       |       |
|------|-----|-------------------------|------|---|-------------|--------------|-----------------------------|---------------|----------------|--------------|--------------|---------------------------|---------------|----------------|---------------|--------------|-----------------------------|---------------|----------------|----------------|--------------|------------------------|---------------|---------------|--------------|--------------|-------------------------------|--------|--------------|-------------|--------------|----|--------|-------|-------|
| SNP# | HAP | North European Families |      |   |             |              | Caribbean Hispanic Families |               |                |              |              | Israeli Arab case-control |               |                |               |              | North European case-control |               |                |                |              | MIRAGE Caucasians Sibs |               |               |              |              | MIRAGE African-Americans Sibs |        |              |             |              |    |        |       |       |
|      |     | Hap frequency           | Info | Z | Hap p-value | Global sim p | Hap frequency               | Info          | Z              | Hap p-value  | Global sim p | Control frequency         | Cases         | Z              | Hap p-value   | Global sim p | Control frequency           | Cases         | Z              | Hap p-value    | Global sim p | Hap frequency          | Info          | Z             | Hap p-value  | Global sim p | Hap frequency                 | Info   | Z            | Hap p-value | Global sim p |    |        |       |       |
| 1    | 2   | 3                       | 4    | A | C           | 0.256        | 44                          | -3.32         | <b>0.00086</b> | <b>0.014</b> | 0.154        | 44                        | -1.039        | 0.299          | 0.850         | 0.230        | 0.219                       | -0.011        | 0.991          | <b>0.018</b>   | ND           | ND                     | ND            | ND            | ND           | 0.269        | 52                            | 1.521  | 0.128        | 0.327       | 0.041        | 10 | *      | *     | 0.541 |
| 1    | 2   | 3                       | 4    | G | G           | 0.098        | 19                          | 2.684         | <b>0.0077</b>  |              | 0.171        | 48                        | 1.080         | 0.280          |               | 0.115        | 0.115                       | -0.220        | 0.826          |                | ND           | ND                     | ND            | ND            | ND           | 0.094        | 33                            | -0.552 | 0.581        |             | 0.185        | 22 | 1.213  | 0.225 |       |
| 1    | 2   | 3                       | 4    | G | G           | 0.044        | 14                          | 1.195         | 0.232          |              | 0.092        | 29                        | -0.708        | 0.479          |               | 0.079        | 0.116                       | -3.032        | <b>0.0024</b>  |                | ND           | ND                     | ND            | ND            | ND           | 0.066        | 25                            | 0.908  | 0.364        |             | 0.012        | 7  | *      | *     |       |
| 1    | 2   | 3                       | 4    | A | G           | 0.015        | 4                           | *             | *              |              | 0.033        | 9                         | *             | *              |               | 0.043        | 0.096                       | 2.102         | <b>0.036</b>   |                | ND           | ND                     | ND            | ND            | ND           | 0.011        | 4                             | *      | *            |             | 0.097        | 19 | -1.292 | 0.196 |       |
| 1    | 2   | 3                       | 4    | A | G           | 0.154        | 28                          | 0.262         | 0.793          |              | 0.157        | 49                        | -0.722        | 0.470          |               | 0.149        | 0.157                       | 0.241         | <b>0.0045</b>  |                | ND           | ND                     | ND            | ND            | ND           | 0.164        | 36                            | -0.750 | 0.453        |             | 0.164        | 22 | -1.601 | 0.109 |       |
| 2    | 3   | 4                       | 5    | C | A           | 0.162        | 32                          | 1.065         | 0.287          | 0.458        | 0.104        | 39                        | 0.833         | 0.351          | 0.892         | 0.132        | 0.085                       | -3.067        | <b>0.0039</b>  | <b>0.044</b>   | ND           | ND                     | ND            | ND            | ND           | 0.164        | 45                            | 0.827  | 0.531        | 0.067       | 0.015        | 4  | *      | *     | 0.851 |
| 2    | 3   | 4                       | 5    | G | A           | 0.104        | 21                          | -0.457        | 0.648          |              | 0.098        | 44                        | 0.391         | 0.696          |               | <b>0.086</b> | <b>0.221</b>                | <b>3.283</b>  | <b>0.0310</b>  |                | ND           | ND                     | ND            | ND            | ND           | 0.142        | 32                            | 0.834  | 0.404        |             | 0.057        | 19 | -0.050 | 0.960 |       |
| 2    | 3   | 4                       | 5    | C | A           | <b>0.164</b> | <b>33</b>                   | <b>-2.259</b> | <b>0.024</b>   |              | 0.065        | 21                        | -0.328        | 0.743          |               | 0.129        | 0.091                       | 0.119         | 0.9055         |                | ND           | ND                     | ND            | ND            | ND           | 0.145        | 39                            | -0.224 | 0.823        |             | 0.012        | 4  | *      | *     |       |
| 2    | 3   | 4                       | 5    | G | A           | 0.149        | 30                          | 2.015         | <b>0.044</b>   |              | 0.237        | 59                        | -0.755        | 0.450          |               | 0.176        | 0.123                       | -0.327        | 0.743          |                | ND           | ND                     | ND            | ND            | ND           | 0.131        | 32                            | -0.565 | 0.572        |             | 0.295        | 36 | -0.056 | 0.955 |       |
| 2    | 3   | 4                       | 5    | C | A           | 0.086        | 18                          | -0.816        | 0.414          |              | 0.083        | 29                        | -0.759        | 0.448          |               | 0.096        | 0.140                       | -0.175        | 0.861          |                | ND           | ND                     | ND            | ND            | ND           | 0.096        | 26                            | 2.084  | <b>0.037</b> |             | 0.021        | 7  | *      | *     |       |
| 5    | 6   | 7                       | 8    | T | A           | 0.068        | 12                          | -0.915        | 0.360          | 0.289        | 0.041        | 10                        | -0.412        | 0.681          | 0.444         | 0.089        | 0.042                       | -2.011        | <b>0.044</b>   | <b>0.019</b>   | 0.067        | 0.048                  | -1.092        | 0.275         | 0.627        | 0.038        | 9                             | *      | *            | 0.624       | 0.026        | 1  | *      | *     | 0.675 |
| 5    | 6   | 7                       | 8    | T | A           | 0.321        | 49                          | 1.241         | 0.215          |              | 0.271        | 74                        | -1.010        | 0.313          |               | 0.336        | 0.264                       | -1.949        | 0.051          |                | 0.339        | 0.289                  | -1.591        | 0.112         |              | 0.302        | 51                            | 1.579  | 0.114        |             | 0.156        | 38 | 0.953  | 0.341 |       |
| 5    | 6   | 7                       | 8    | C | G           | 0.373        | 54                          | -0.791        | 0.429          |              | 0.195        | 54                        | 0.171         | 0.864          |               | 0.233        | 0.364                       | 2.859         | 0.0037         |                | 0.274        | 49                     | -1.910        | 0.056         |              | 0.274        | 49                            | -1.253 | 0.210        |             | 0.134        | 25 | -0.892 | 0.372 |       |
| 6    | 7   | 8                       | 9    | G | A           | 0.527        | 51                          | -1.776        | 0.074          | 0.278        | 0.015        | 77                        | 1.639         | 0.101          | <b>0.045</b>  | <b>0.424</b> | <b>0.659</b>                | <b>3.374</b>  | <b>0.010</b>   | <b>0.045</b>   | <b>0.510</b> | <b>0.559</b>           | <b>2.122</b>  | <b>0.033</b>  | 0.120        | 0.313        | 44                            | -2.004 | <b>0.045</b> | 0.168       | 0.320        | 42 | -0.260 | 0.795 |       |
| 6    | 7   | 8                       | 9    | A | T           | 0.329        | 49                          | 1.236         | 0.216          |              | 0.290        | 78                        | -1.780        | 0.075          | <b>0.045</b>  | 0.358        | 0.258                       | -2.135        | <b>0.033</b>   |                | 0.381        | 0.307                  | -1.621        | 0.105         |              | 0.146        | 30                            | 0.609  | 0.542        |             | 0.083        | 21 | 0.024  | 0.981 |       |
| 6    | 7   | 8                       | 9    | T | G           | 0.010        | 1                           | *             | *              |              | 0.006        | 1                         | *             | *              |               | 0.010        | 0                           | *             | *              |                | 0.010        | 0                      | -1.672        | 0.095         |              | 0.126        | 24                            | -0.666 | 0.386        |             | 0.215        | 25 | -0.626 | 0.531 |       |
| 6    | 7   | 8                       | 9    | A | T           | 0.001        | 0                           | *             | *              |              | 0.004        | 0                         | *             | *              |               | *            | *                           | *             | *              |                | *            | *                      | *             | *             |              | 0.183        | 23                            | 2.464  | <b>0.014</b> |             | 0.103        | 19 | 0.348  | 0.727 |       |
| 6    | 7   | 8                       | 9    | T | A           | 0.064        | 11                          | 0.181         | 0.856          |              | 0.037        | 10                        | -1.040        | 0.298          |               | 0.084        | 0.039                       | -2.008        | <b>0.045</b>   |                | 0.059        | 0.048                  | -0.670        | 0.503         |              | 0.014        | 4                             | *      | *            |             |              |    |        |       |       |
| 7    | 8   | 9                       | 10   | C | G           | 0.528        | 51                          | -1.561        | 0.119          | 0.187        | 0.516        | 74                        | 1.409         | 0.159          | <b>0.025</b>  | <b>0.494</b> | <b>0.609</b>                | <b>2.385</b>  | <b>0.017</b>   | 0.053          | <b>0.513</b> | <b>0.599</b>           | <b>2.289</b>  | <b>0.022</b>  | 0.091        | 0.303        | 46                            | -1.694 | 0.090        | 0.230       | 0.320        | 42 | -0.660 | 0.509 | 0.853 |
| 7    | 8   | 9                       | 10   | A | T           | 0.390        | 53                          | 1.136         | 0.256          |              | <b>0.317</b> | <b>73</b>                 | <b>-2.594</b> | <b>0.0095</b>  |               | <b>0.434</b> | <b>0.297</b>                | <b>-1.825</b> | <b>0.068</b>   |                | <b>0.417</b> | <b>0.351</b>           | <b>-1.825</b> | <b>0.068</b>  |              | 0.171        | 35                            | 0.820  | 0.412        |             | 0.070        | 20 | 0.156  | 0.876 |       |
| 7    | 8   | 9                       | 10   | C | G           | 0.053        | 14                          | 1.046         | 0.295          |              | 0.126        | 33                        | 1.932         | 0.053          |               | 0.046        | 0.052                       | 0.298         | 0.766          |                | 0.053        | 0.039                  | -0.702        | 0.483         |              | 0.105        | 18                            | 0.519  | 0.603        |             | 0.158        | 29 | 0.257  | 0.798 |       |
| 7    | 8   | 9                       | 10   | A | T           | 0.010        | 1                           | *             | *              |              | 0.006        | 2                         | *             | *              |               | 0.009        | 0.014                       | 0.394         | 0.693          |                | 0.010        | 0                      | -1.662        | 0.096         |              | 0.128        | 24                            | -0.659 | 0.510        |             | 0.227        | 24 | -0.061 | 0.952 |       |
| 7    | 8   | 9                       | 10   | C | G           | 0.001        | 0                           | *             | *              |              | 0.001        | 0                         | *             | *              |               | *            | *                           | *             | *              |                | *            | *                      | *             | *             |              | 0.205        | 24                            | 2.051  | <b>0.039</b> |             | 0.08         | 18 | -0.195 | 0.845 |       |
| 8    | 9   | 10                      | 11   | C | G           | 0.410        | 54                          | -1.041        | 0.298          | 0.640        | 0.218        | 48                        | -1.155        | 0.248          | <b>0.0068</b> | <b>0.282</b> | <b>0.406</b>                | <b>2.859</b>  | <b>0.0043</b>  | <b>0.011</b>   | <b>0.385</b> | <b>0.454</b>           | <b>1.957</b>  | <b>0.050</b>  | 0.392        | 0.282        | 43                            | -1.092 | 0.275        | 0.268       | 0.089        | 20 | 0.026  | 0.979 | 0.748 |
| 8    | 9   | 10                      | 11   | T | A           | 0.379        | 54                          | 0.858         | 0.391          |              | <b>0.306</b> | <b>66</b>                 | <b>-2.823</b> | <b>0.026</b>   |               | <b>0.405</b> | <b>0.247</b>                | <b>-3.377</b> | <b>0.00073</b> |                | <b>0.392</b> | <b>0.324</b>           | <b>-1.887</b> | <b>0.059</b>  |              | 0.218        | 35                            | -0.800 | 0.423        |             | 0.064        | 19 | 0.151  | 0.880 |       |
| 8    | 9   | 10                      | 11   | C | G           | 0.172        | 40                          | 0.164         | 0.870          |              | 0.428        | 64                        | 3.160         | <b>0.0016</b>  |               | 0.257        | 0.255                       | -0.215        | 0.830          |                | 0.181        | 0.184                  | 0.186         | 0.852         |              | 0.125        | 23                            | -0.162 | 0.871        |             | 0.403        | 46 | -0.645 | 0.519 |       |
| 8    | 9   | 10                      | 11   | T | A           | 0.001        | 0                           | *             | *              |              | 0.005        | 0                         | *             | *              |               | 0.009        | 0.014                       | 0.406         | 0.684          |                | *            | *                      | *             | *             |              | 0.205        | 19                            | 2.483  | <b>0.014</b> |             | 0.070        | 17 | 0.273  | 0.784 |       |
| 9    | 10  | 11                      | 12   | C | G           | 0.409        | 57                          | -1.300        | 0.194          | 0.240        | 0.213        | 51                        | -1.818        | 0.069          | <b>0.012</b>  | <b>0.282</b> | <b>0.407</b>                | <b>2.828</b>  | <b>0.0047</b>  | <b>0.0080</b>  | <b>0.379</b> | <b>0.455</b>           | <b>2.143</b>  | <b>0.032</b>  | 0.241        | 0.263        | 49                            | -1.118 | 0.264        | 0.591       | 0.066        | 17 | 0.484  | 0.628 | 0.853 |
| 9    | 10  | 11                      | 12   | A | T           | 0.378        | 54                          | 0.795         | 0.426          |              | <b>0.315</b> | <b>68</b>                 | <b>-1.970</b> | <b>0.049</b>   |               | <b>0.410</b> | <b>0.247</b>                | <b>-3.390</b> | <b>0.00070</b> |                | <b>0.394</b> | <b>0.324</b>           | <b>-1.906</b> | <b>0.057</b>  |              | 0.221        | 42                            | -0.464 | 0.643        |             | 0.104        | 19 | 0.157  | 0.875 |       |
| 9    | 10  | 11                      | 12   | C | G           | 0.130        | 28                          | -0.772        | 0.440          |              | 0.350        | 55                        | 2.347         | <b>0.019</b>   |               | 0.256        | 0.251                       | -0.258        | 0.796          |                | 0.140        | 0.151                  | 0.480         | 0.631         |              | 0.100        | 17                            | 1.234  | 0.217        |             | 0.345        | 45 | -0.049 | 0.961 |       |
| 9    | 10  | 11                      | 12   | C | G           | 0.044        | 13                          | 2.033         | <b>0.042</b>   |              | 0.081        | 30                        | 1.377         | 0.158          |               | 0.269        | 0.372                       | 2.133         | <b>0.033</b>   |                | 0.049        | 0.040                  | -0.574        | 0.566         |              | 0.032        | 12                            | -0.823 | 0.410        |             | 0.056        | 9  | *      | *     |       |
| 10   | 11  | 12                      | 13   | C | G           | 0.396        | 56                          | 0.907         | 0.354          | 0.127        | 0.348        | 77                        | -1.468        | 0.142          | 0.085         | 0.418        | 0.265                       | -3.187        | <b>0.0014</b>  | <b>0.0037</b>  | 0.322        | 0.323                  | -0.383        | 0.656         | 0.325        | 0.442        | 71                            | -0.832 | 0.527        | 0.385       | 0.229        | 39 | 0.869  | 0.504 | 0.978 |
| 10   | 11  | 12                      | 13   | C | G           | 0.396        | 58                          | -1.391        | 0.164          |              | 0.211        | 58                        | -1.112        | 0.266          |               | <b>0.281</b> | <b>0.423</b>                | <b>3.067</b>  | <b>0.0022</b>  |                | <b>0.388</b> | <b>0.458</b>           | <b>1.967</b>  | <b>0.049</b>  |              | 0.330        | 70                            | -0.803 | 0.422        |             | 0.124        | 27 | -0.488 | 0.626 |       |
| 10   | 11  | 12                      | 13   | C | A           | 0.035        | 13                          | 2.034         | <b>0.042</b>   |              | 0.052        | 30                        | 1.092         | 0.848          |               | *            | *                           | *             | *              |                | 0.040        | 0.040                  | -0.624        | 0.533         |              | 0.032        | 18                            | 0.919  | 0.358        |             | 0.034        | 17 | 0.337  | 0.735 |       |
| 10   | 11  | 12                      | 13   | C | A           | 0.149        | 30                          | -0.897        | 0.370          |              | 0.364        | 63                        | 2.264         | <b>0.024</b>   |               | 0.271        | 0.262                       | -0.268        | 0.789          |                | 0.144        | 0.152                  | 0.391         | 0.695         |              | 0.163        | 42                            | 1.578  | 0.115        |             | 0.589        | 50 | -0.358 | 0.720 |       |
| 11   | 12  | 13                      | 14   | A | C           | 0.488        | 52                          | 1.396         | 0.163          | 0.063        | <b>0.599</b> | <b>64</b>                 | <b>-2.619</b> | <b>0.00088</b> | <b>0.0078</b> | <b>0.558</b> | <b>0.386</b>                | <b>-3.075</b> | <b>0.0021</b>  | <b>0.00025</b> | <b>0.486</b> | <b>0.365</b>           | <b>-2.751</b> | <b>0.0059</b> | <b>0.039</b> | 0.531        | 69                            | -0.252 | 0.801        | 0.428       | 0.739        | 40 | -0.238 | 0.712 | 0.800 |
| 11   | 12  | 13                      | 14   | C | G           | 0.413        | 57                          | -0.996        | 0.319          |              | <b>0.204</b> | <b>51</b>                 | <b>2.072</b>  | <b>0.038</b>   |               | <b>0.251</b> | <b>0.452</b>                | <b>3.684</b>  | <b>0.00023</b> |                | <b>0.382</b> | <b>0.477</b>           | <b>2.175</b>  | <b>0.030</b>  |              | 0.380        | 64                            | -0.818 | 0.413        |             | 0.135        | 28 | -0.443 | 0.658 |       |
| 11   | 12  | 13                      | 14   | A | C           | 0.058        | 20                          | -1.958        | 0.050          |              | 0.110        | 31                        | 1.844         | 0.065          |               | 0.131        | 0.143                       | -0.198        | 0.843          |                | 0.057        | 0.099                  | 1.628         | 0.104         |              | 0.046        | 15                            | 1.870  | 0.061        |             | 0.074        | 15 | 0.145  | 0.885 |       |
| 11   | 12  | 13                      | 14   | A | T           | 0.034        | 12                          | 1.985         | <b>0.047</b>   |              | 0.060        | 29                        | -1.214        | 0.225          |               | 0.049        | 0.040                       | -0.624        | 0.523          |                | 0.049        | 0.040                  | -0.624        |               |              |              |                               |        |              |             |              |    |        |       |       |
